# Supplementary material for: A Low-Dose CT-Based Radiomic Model to Improve Characterization and Screening Recall Intervals of Indeterminate Prevalent Pulmonary Nodules
Source: MDPI journal article supplement (doi:10.3390/diagnostics11091610), 2021-09-03
Supplement: s1 [file s1]

# A Low-dose CT-based Radiomic Model to Improve Characterization and Screening Recall Intervals of Indeterminate Prevalent Pulmonary Nodules

## Supplementary Materials

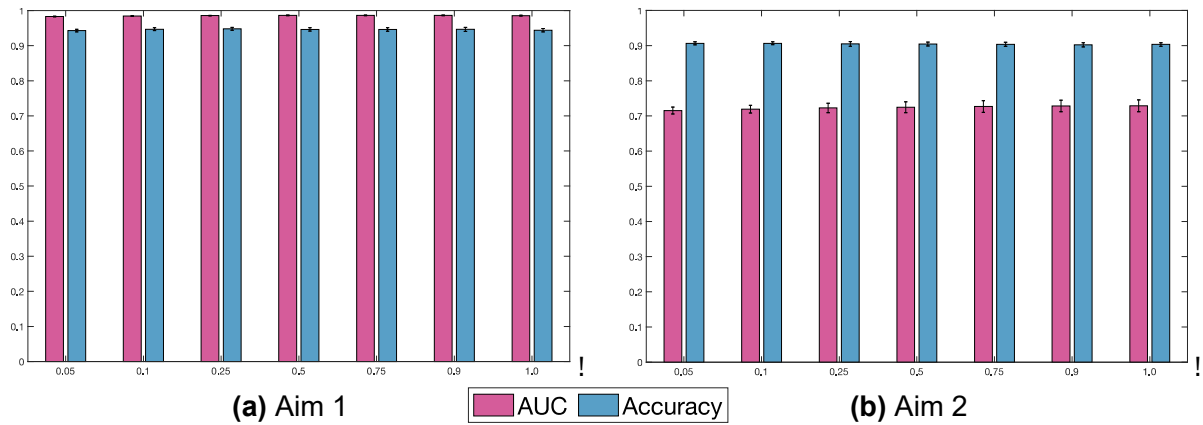

**Figure S1:** Hyper-parameter optimisation of the radiomic models in terms of the mixing parameter  $\alpha$  (Elastic Net  $\ell_1/\ell_2$  regularization parameter): **(a)** Aim 1; **(b)** Aim 2. The Elastic Net models were trained in 5-fold nested CV and the process was repeated 30 times. The considered evaluation metrics were AUC and accuracy.

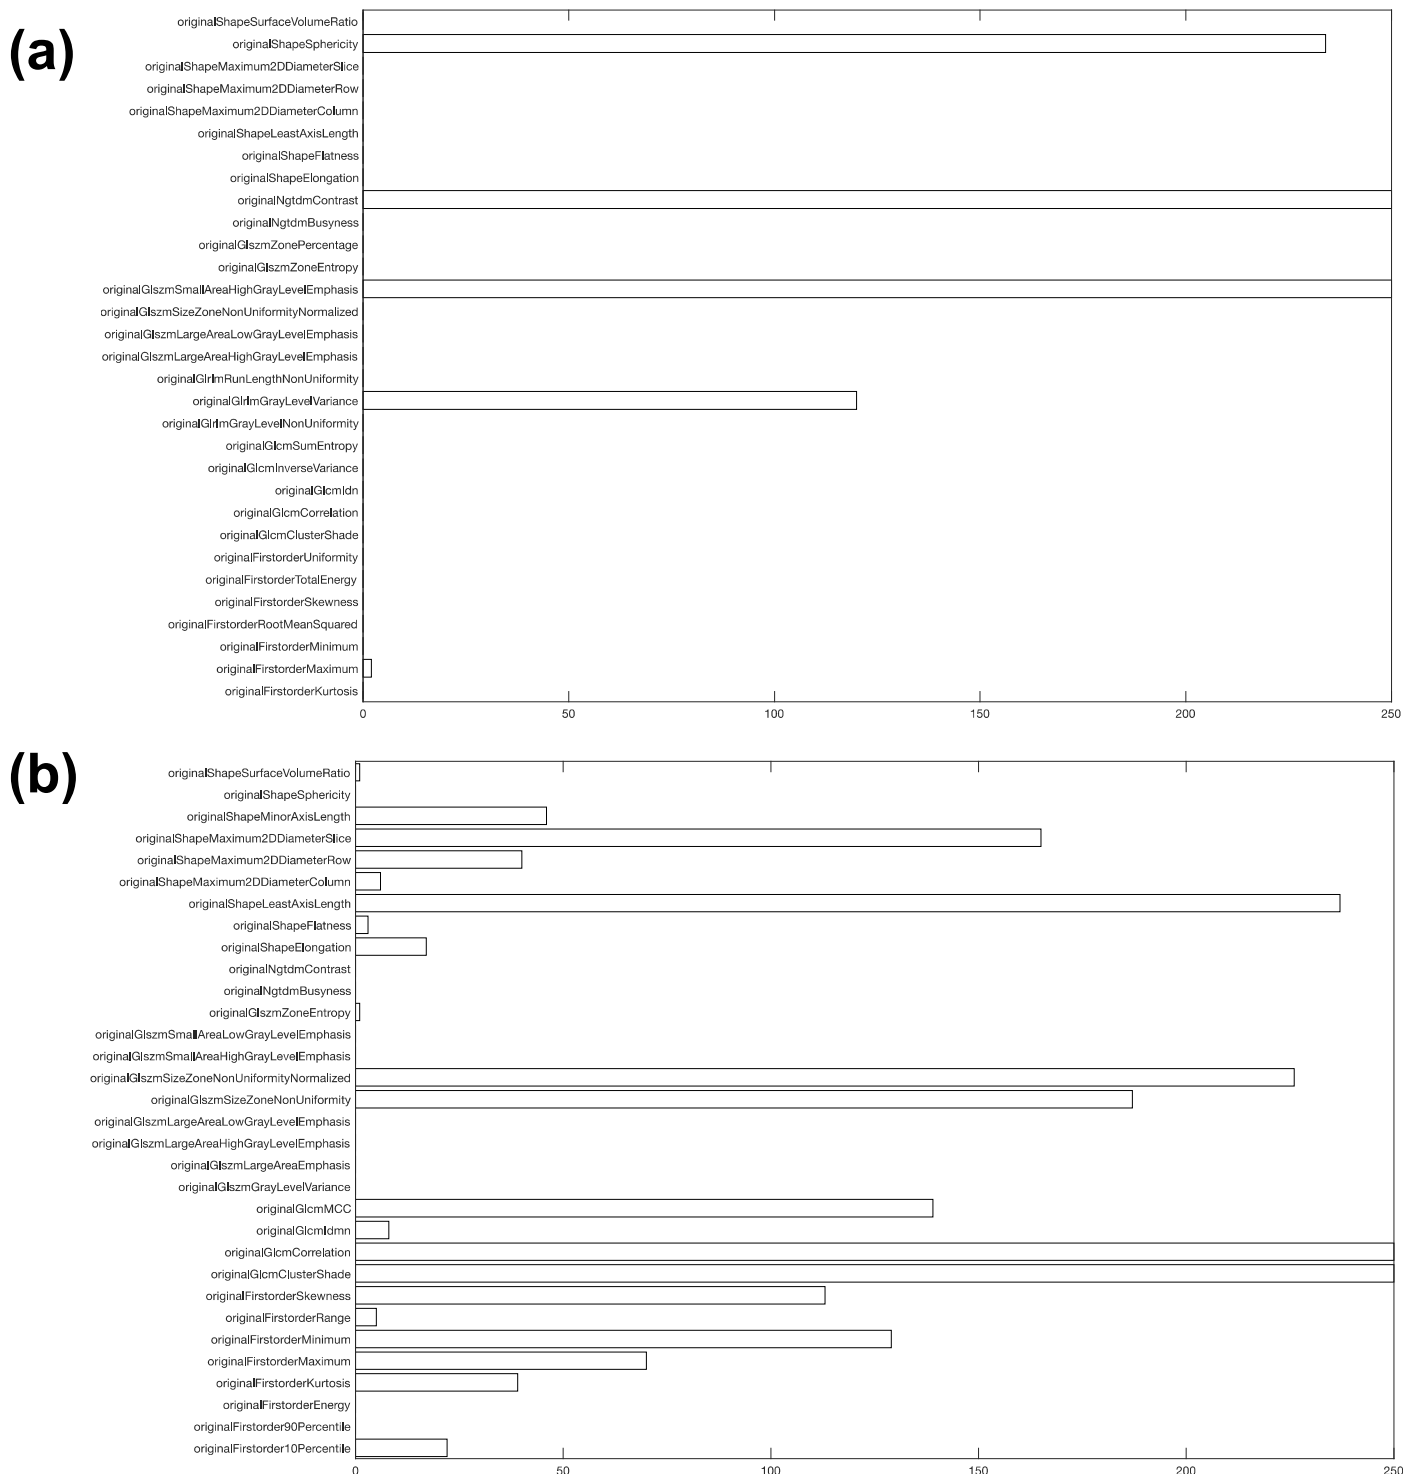

**Figure S2:** Most frequently selected radiomic feature analysis of the Elastic Net models considering the features selected after 50 repetitions on the nested 5-fold CV on the discovery cohort for: **(a)** Aim 1; **(b)** Aim 2. A total of 250 models were trained for each task.

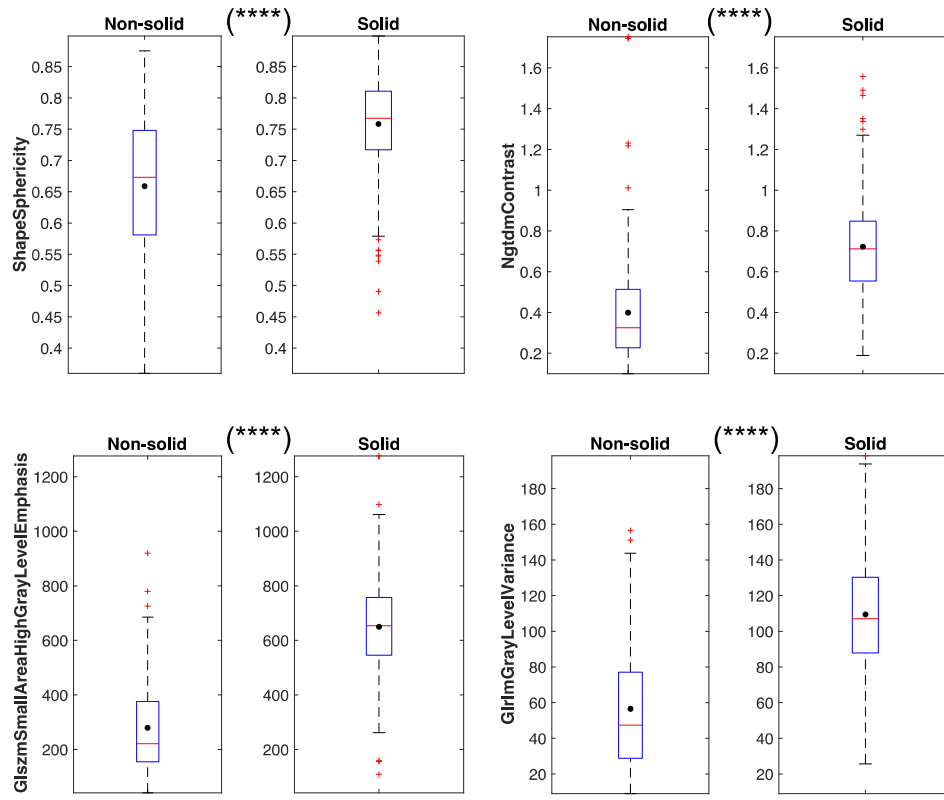

**Figure S3:** Boxplots of the four most frequently selected radiomic features for Aim 1 solid *vs.* sub-solid nodule classification on the discovery dataset. For each feature, a non-parametric Wilcoxon sum test (Mann-Whitney U test) was performed by sub-dividing the samples into the two classes (significance level set to 0.05). The  $p$ -values were adjusted using the Bonferroni-Holm method for multiple comparison tests. Notation: \*  $p < 0.05$ , \*\*  $p < 0.01$ , \*\*\*  $p < 0.001$ , \*\*\*\*  $p < 0.0001$ .

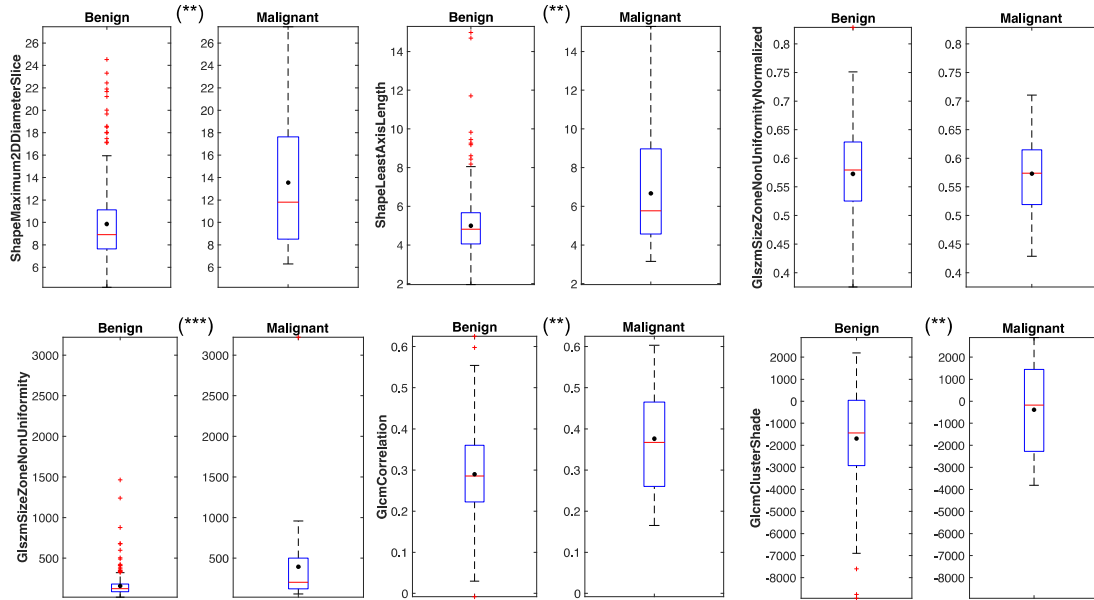

**Figure S4:** Boxplots of the six most frequently selected radiomic features for Aim 2 malignant *vs.* benign primary nodule classification on the discovery dataset. For each feature, a non-parametric Wilcoxon sum test (Mann-Whitney U test) was performed by sub-dividing the samples into the two classes (significance level set to 0.05). The  $p$ -values were adjusted using the Bonferroni-Holm method for multiple comparison tests. Notation: \*  $p < 0.05$ , \*\*  $p < 0.01$ , \*\*\*  $p < 0.001$ , \*\*\*\*  $p < 0.0001$ .

## PCA and t-SNE results

**Figure S5** shows the dimensionality reduction results for both methods on the discovery set of primary malignant nodules (Aim 1) for all the 107 radiomic features, as well as for the most frequently selected ones. While PCA is useful for plotting samples in a space with reduced dimensionality, t-SNE is useful for understanding the data distribution in a multidimensional manifold. The PCA showed that there is a very strong linear component (i.e., the first two main components have about 99.7% of explained variance); in both sub-figures, with greater detail in the case of the figure relating to the PCA with the relevant features, it is worth noting that there is an outlier in the original samples without which the distribution would appear totally different. In the case of the t-SNE plots, the samples concerning the most relevant features cover a higher portion of the space compared to the samples when all features were considered. The distribution of the synthetic samples is generated within the "convex hull" defined by the original samples, and this is due to the way the new synthetic samples were generated by the PCA.

### *Over-sampling distributions (Borderline-SMOTE)*

**Figure S6** shows the distributions of the synthetic samples generated by Borderline-SMOTE compared against the actual minority class samples (i.e., malignant primary nodules) included in the discovery set.

The synthetic distributions appear fairly overlapping with the original ones, and thus the synthetic data can be considered reliable and correctly generated for our purposes. In particular, the  $\chi^2$  test was used to assess the frequency distribution overlap. The synthetic distributions for GLCM Correlation and GLSZM Size Zone Non-Uniformity Normalized appear to be the most similar to the original dataset. Therefore, we can argue that the distributions are overlapping both qualitatively and quantitatively (considering the  $\chi^2$  test), thus justifying their use in the experiments employing minority class over-sampled samples. **Tables S3 and S4** present the performance achieved by the classifier for Aim 2 on the blinded test set, by using the investigated minority over-sampling and majority class under-sampling configurations, respectively.

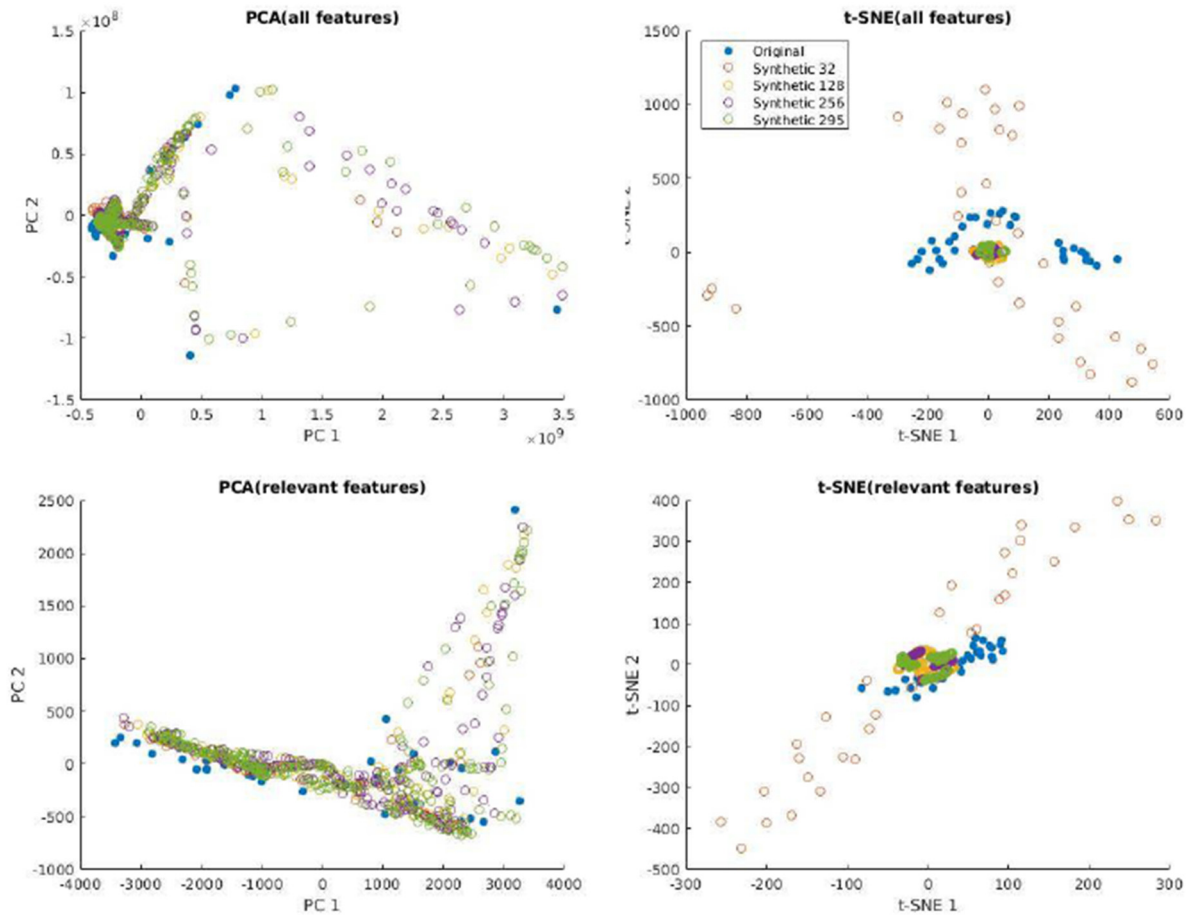

**Figure S5.** Dimensionality reduction to assess the data distribution for the synthetic samples generated by Borderline-SMOTE on the discovery set of primary malignant nodules (Aim 1) for all the 107 radiomic features, as well as for the most frequently selected ones.

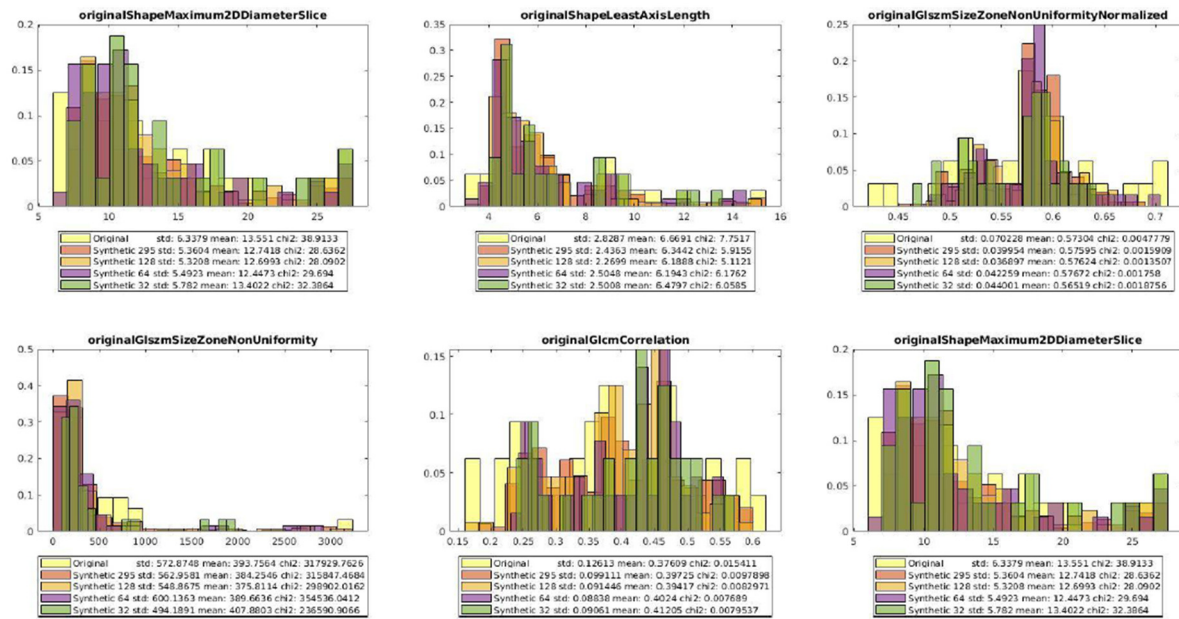

**Figure S6.** Distributions of the synthetic samples generated by Borderline-SMOTE compared against the actual minority class samples (i.e. malignant primary nodules) included in the discovery set. A plot for each of the most relevant features is shown.

**Table S1.** Results for the benign *vs.* malignant primary nodule classification (Aim 2) achieved by the nested 5-fold CV on the discovery set for each minority class over-sampling method under consideration. The metrics are expressed as average  $\pm$  standard deviation. The rows in boldface denote the best performing configurations.

| # Samples               | AUC                                 | Accuracy                            | PPV                                 | NPV                                 | Sensitivity                         | Specificity                         |
|-------------------------|-------------------------------------|-------------------------------------|-------------------------------------|-------------------------------------|-------------------------------------|-------------------------------------|
| <b>SMOTE</b>            |                                     |                                     |                                     |                                     |                                     |                                     |
| 32                      | 0.7103 $\pm$ 0.0067                 | 0.8331 $\pm$ 0.0065                 | 0.6081 $\pm$ 0.0612                 | 0.8551 $\pm$ 0.0049                 | 0.2502 $\pm$ 0.0324                 | 0.9601 $\pm$ 0.0094                 |
| 64                      | 0.7298 $\pm$ 0.0074                 | 0.7963 $\pm$ 0.0074                 | 0.6595 $\pm$ 0.0270                 | 0.8206 $\pm$ 0.0067                 | 0.3710 $\pm$ 0.0296                 | 0.9352 $\pm$ 0.0081                 |
| 128                     | 0.7397 $\pm$ 0.0045                 | 0.7374 $\pm$ 0.0073                 | 0.7260 $\pm$ 0.0284                 | 0.7469 $\pm$ 0.0053                 | 0.4341 $\pm$ 0.0236                 | 0.9025 $\pm$ 0.0196                 |
| 192                     | 0.7473 $\pm$ 0.0049                 | 0.7103 $\pm$ 0.0068                 | 0.7225 $\pm$ 0.0193                 | 0.7126 $\pm$ 0.0106                 | 0.5545 $\pm$ 0.0323                 | 0.8290 $\pm$ 0.0219                 |
| 256                     | 0.7391 $\pm$ 0.0044                 | 0.6882 $\pm$ 0.0079                 | 0.7309 $\pm$ 0.0127                 | 0.6642 $\pm$ 0.0091                 | 0.59241 $\pm$ 0.0221                | 0.7821 $\pm$ 0.0181                 |
| 295                     | 0.7438 $\pm$ 0.0044                 | 0.6907 $\pm$ 0.0072                 | 0.7467 $\pm$ 0.0107                 | 0.6489 $\pm$ 0.0076                 | 0.6263 $\pm$ 0.0138                 | 0.7624 $\pm$ 0.0144                 |
| <b>Borderline-SMOTE</b> |                                     |                                     |                                     |                                     |                                     |                                     |
| 32                      | 0.7682 $\pm$ 0.0084                 | 0.8258 $\pm$ 0.0067                 | 0.5684 $\pm$ 0.0610                 | 0.8572 $\pm$ 0.0069                 | 0.2920 $\pm$ 0.0430                 | 0.9456 $\pm$ 0.0091                 |
| 64                      | 0.7876 $\pm$ 0.0043                 | 0.8090 $\pm$ 0.0084                 | 0.6691 $\pm$ 0.0325                 | 0.8388 $\pm$ 0.0083                 | 0.4316 $\pm$ 0.0381                 | 0.9283 $\pm$ 0.0117                 |
| <b>128</b>              | <b>0.8259<math>\pm</math>0.0035</b> | <b>0.7935<math>\pm</math>0.0069</b> | <b>0.7413<math>\pm</math>0.0126</b> | <b>0.8196<math>\pm</math>0.0076</b> | <b>0.6436<math>\pm</math>0.0206</b> | <b>0.8751<math>\pm</math>0.0089</b> |
| 192                     | 0.7952 $\pm$ 0.0024                 | 0.7827 $\pm$ 0.0055                 | 0.8062 $\pm$ 0.0101                 | 0.7724 $\pm$ 0.0047                 | 0.6574 $\pm$ 0.0093                 | 0.8782 $\pm$ 0.0090                 |
| <b>256</b>              | <b>0.8173<math>\pm</math>0.0031</b> | <b>0.7661<math>\pm</math>0.0055</b> | <b>0.8297<math>\pm</math>0.0091</b> | <b>0.7256<math>\pm</math>0.0041</b> | <b>0.6699<math>\pm</math>0.0063</b> | <b>0.8617<math>\pm</math>0.0089</b> |
| 295                     | 0.8021 $\pm$ 0.0033                 | 0.7485 $\pm$ 0.0052                 | 0.8396 $\pm$ 0.0094                 | 0.6882 $\pm$ 0.0043                 | 0.6477 $\pm$ 0.0064                 | 0.8605 $\pm$ 0.0104                 |
| <b>Safe-Level-SMOTE</b> |                                     |                                     |                                     |                                     |                                     |                                     |
| 32                      | 0.7156 $\pm$ 0.0087                 | 0.8156 $\pm$ 0.0080                 | 0.4906 $\pm$ 0.0965                 | 0.8373 $\pm$ 0.0049                 | 0.1502 $\pm$ 0.0357                 | 0.9628 $\pm$ 0.0138                 |
| 64                      | 0.7242 $\pm$ 0.0063                 | 0.7781 $\pm$ 0.0082                 | 0.5713 $\pm$ 0.0294                 | 0.8274 $\pm$ 0.0099                 | 0.4071 $\pm$ 0.0473                 | 0.8968 $\pm$ 0.0129                 |
| 128                     | 0.7091 $\pm$ 0.0052                 | 0.7267 $\pm$ 0.0067                 | 0.6674 $\pm$ 0.0153                 | 0.7484 $\pm$ 0.0061                 | 0.4608 $\pm$ 0.0187                 | 0.8723 $\pm$ 0.0108                 |
| 192                     | 0.7507 $\pm$ 0.0044                 | 0.7226 $\pm$ 0.0074                 | 0.7334 $\pm$ 0.0182                 | 0.7218 $\pm$ 0.0065                 | 0.5703 $\pm$ 0.0177                 | 0.8382 $\pm$ 0.0186                 |
| 256                     | 0.7721 $\pm$ 0.0040                 | 0.7305 $\pm$ 0.0065                 | 0.7627 $\pm$ 0.0090                 | 0.7104 $\pm$ 0.0094                 | 0.6652 $\pm$ 0.0195                 | 0.7945 $\pm$ 0.0125                 |
| 295                     | 0.7764 $\pm$ 0.0040                 | 0.7334 $\pm$ 0.0051                 | 0.7779 $\pm$ 0.0081                 | 0.6968 $\pm$ 0.0059                 | 0.6928 $\pm$ 0.0111                 | 0.7786 $\pm$ 0.0112                 |
| <b>ADASYN</b>           |                                     |                                     |                                     |                                     |                                     |                                     |
| 32                      | 0.7341 $\pm$ 0.0078                 | 0.8405 $\pm$ 0.0053                 | 0.6596 $\pm$ 0.0736                 | 0.8565 $\pm$ 0.0039                 | 0.2521 $\pm$ 0.0252                 | 0.9685 $\pm$ 0.0069                 |
| 64                      | 0.7337 $\pm$ 0.0059                 | 0.7905 $\pm$ 0.0078                 | 0.6819 $\pm$ 0.0334                 | 0.8070 $\pm$ 0.0055                 | 0.3016 $\pm$ 0.0255                 | 0.9502 $\pm$ 0.0090                 |
| 128                     | 0.7494 $\pm$ 0.0051                 | 0.7271 $\pm$ 0.0076                 | 0.6887 $\pm$ 0.0231                 | 0.7474 $\pm$ 0.0076                 | 0.4601 $\pm$ 0.0248                 | 0.8752 $\pm$ 0.0155                 |
| 192                     | 0.7479 $\pm$ 0.0056                 | 0.7185 $\pm$ 0.0077                 | 0.7331 $\pm$ 0.0130                 | 0.7172 $\pm$ 0.0076                 | 0.5579 $\pm$ 0.0166                 | 0.8409 $\pm$ 0.0143                 |
| 256                     | 0.7507 $\pm$ 0.0051                 | 0.7014 $\pm$ 0.0087                 | 0.7607 $\pm$ 0.0159                 | 0.6704 $\pm$ 0.0060                 | 0.5854 $\pm$ 0.0117                 | 0.8149 $\pm$ 0.0186                 |
| 295                     | 0.7427 $\pm$ 0.0051                 | 0.6931 $\pm$ 0.0080                 | 0.7854 $\pm$ 0.0126                 | 0.6401 $\pm$ 0.0068                 | 0.5804 $\pm$ 0.0098                 | 0.8186 $\pm$ 0.0139                 |

**Table S2.** Results for the benign vs. malignant primary nodule classification (Aim 2) achieved by the nested 5-fold CV on the discovery set for each majority class under-sampling method under consideration. The metrics are expressed as average  $\pm$  standard deviation.

| # Samples | AUC                 | Accuracy            | PPV                 | NPV                 | Sensitivity         | Specificity         |
|-----------|---------------------|---------------------|---------------------|---------------------|---------------------|---------------------|
| 32        | 0.7730 $\pm$ 0.0249 | 0.6316 $\pm$ 0.0311 | 0.6344 $\pm$ 0.0641 | 0.6695 $\pm$ 0.0717 | 0.6504 $\pm$ 0.0796 | 0.6182 $\pm$ 0.0686 |
| 64        | 0.7679 $\pm$ 0.0194 | 0.7649 $\pm$ 0.0184 | 0.7704 $\pm$ 0.0820 | 0.7765 $\pm$ 0.0130 | 0.4563 $\pm$ 0.0394 | 0.9186 $\pm$ 0.0332 |
| 96        | 0.7464 $\pm$ 0.0149 | 0.7910 $\pm$ 0.0111 | 0.6825 $\pm$ 0.0905 | 0.8125 $\pm$ 0.0094 | 0.3372 $\pm$ 0.0454 | 0.9418 $\pm$ 0.0176 |
| 128       | 0.7387 $\pm$ 0.0169 | 0.8081 $\pm$ 0.0124 | 0.5557 $\pm$ 0.0128 | 0.8336 $\pm$ 0.0086 | 0.2337 $\pm$ 0.0509 | 0.9519 $\pm$ 0.0176 |
| 256       | 0.7141 $\pm$ 0.0143 | 0.8874 $\pm$ 0.0064 | 0.4464 $\pm$ 0.0150 | 0.9041 $\pm$ 0.0041 | 0.1670 $\pm$ 0.0414 | 0.9774 $\pm$ 0.0067 |

**Table S3.** Results for the benign *vs.* malignant primary nodule classification (Aim 2) achieved by the fitted models (in nested 5-fold CV) on the blinded test set for each minority class over-sampling method under consideration. The metrics are expressed as average  $\pm$  standard deviation. The rows in boldface denote the best performing configurations.

| # Samples               | AUC                                 | Accuracy                            | PPV                                 | NPV                                 | Sensitivity                            | Specificity                         |
|-------------------------|-------------------------------------|-------------------------------------|-------------------------------------|-------------------------------------|----------------------------------------|-------------------------------------|
| <b>SMOTE</b>            |                                     |                                     |                                     |                                     |                                        |                                     |
| 32                      | 0.6110 $\pm$ 0.0147                 | 0.8587 $\pm$ 0.0109                 | 0.3802 $\pm$ 0.0666                 | 0.8923 $\pm$ 0.0044                 | 0.1938 $\pm$ 0.0388                    | 0.9536 $\pm$ 0.0130                 |
| 64                      | 0.6107 $\pm$ 0.0176                 | 0.8256 $\pm$ 0.0190                 | 0.2759 $\pm$ 0.0558                 | 0.8918 $\pm$ 0.0027                 | 0.2262 $\pm$ 0.0185                    | 0.9112 $\pm$ 0.0223                 |
| 128                     | 0.5922 $\pm$ 0.0120                 | 0.7038 $\pm$ 0.0282                 | 0.1834 $\pm$ 0.0153                 | 0.8969 $\pm$ 0.0067                 | 0.3969 $\pm$ 0.0666                    | 0.7477 $\pm$ 0.0394                 |
| 192                     | 0.5670 $\pm$ 0.0099                 | 0.6056 $\pm$ 0.0121                 | 0.1501 $\pm$ 0.0047                 | 0.8905 $\pm$ 0.0021                 | 0.4615 $\pm$ 4.485e-16                 | 0.6262 $\pm$ 0.0138                 |
| 256                     | 0.5487 $\pm$ 0.0117                 | 0.5562 $\pm$ 0.0213                 | 0.1378 $\pm$ 0.0081                 | 0.8849 $\pm$ 0.0063                 | 0.4846 $\pm$ 0.0356                    | 0.5664 $\pm$ 0.0265                 |
| 295                     | 0.5288 $\pm$ 0.0141                 | 0.5154 $\pm$ 0.0196                 | 0.1301 $\pm$ 0.0066                 | 0.8799 $\pm$ 0.0063                 | 0.5062 $\pm$ 0.0384                    | 0.5167 $\pm$ 0.0256                 |
| <b>Borderline-SMOTE</b> |                                     |                                     |                                     |                                     |                                        |                                     |
| 32                      | 0.6015 $\pm$ 0.0124                 | 0.8381 $\pm$ 0.0185                 | 0.3168 $\pm$ 0.0674                 | 0.8936 $\pm$ 0.0023                 | 0.2292 $\pm$ 0.0109                    | 0.9251 $\pm$ 0.0214                 |
| 64                      | 0.5913 $\pm$ 0.0161                 | 0.8046 $\pm$ 0.0180                 | 0.2290 $\pm$ 0.0276                 | 0.8897 $\pm$ 0.0023                 | 0.2308 $\pm$ 2.243e-16                 | 0.8866 $\pm$ 0.0205                 |
| <b>128</b>              | <b>0.5711<math>\pm</math>0.0089</b> | <b>0.6965<math>\pm</math>0.0177</b> | <b>0.1633<math>\pm</math>0.0111</b> | <b>0.8889<math>\pm</math>0.0042</b> | <b>0.3462<math>\pm</math>0.0389</b>    | <b>0.7466<math>\pm</math>0.0239</b> |
| 192                     | 0.5740 $\pm$ 0.0079                 | 0.6431 $\pm$ 0.0084                 | 0.1650 $\pm$ 0.0063                 | 0.8962 $\pm$ 0.0031                 | 0.4569 $\pm$ 0.0185                    | 0.6697 $\pm$ 0.0098                 |
| <b>256</b>              | <b>0.5559<math>\pm</math>0.0067</b> | <b>0.6031<math>\pm</math>0.0099</b> | <b>0.1491<math>\pm</math>0.0038</b> | <b>0.8901<math>\pm</math>0.0018</b> | <b>0.4615<math>\pm</math>4.486e-16</b> | <b>0.6233<math>\pm</math>0.0113</b> |
| 295                     | 0.5475 $\pm$ 0.0087                 | 0.5838 $\pm$ 0.0093                 | 0.1420 $\pm$ 0.0033                 | 0.8866 $\pm$ 0.0018                 | 0.4615 $\pm$ 4.486e-16                 | 0.6013 $\pm$ 0.0107                 |
| <b>Safe-Level-SMOTE</b> |                                     |                                     |                                     |                                     |                                        |                                     |
| 32                      | 0.6217 $\pm$ 0.0148                 | 0.8725 $\pm$ 0.0058                 | 0.4794 $\pm$ 0.0580                 | 0.8954 $\pm$ 0.0039                 | 0.2092 $\pm$ 0.0349                    | 0.9673 $\pm$ 0.0065                 |
| 64                      | 0.5926 $\pm$ 0.0158                 | 0.8051 $\pm$ 0.0198                 | 0.2321 $\pm$ 0.0414                 | 0.8897 $\pm$ 0.0025                 | 0.2308 $\pm$ 2.243e-16                 | 0.8870 $\pm$ 0.0226                 |
| 128                     | 0.5838 $\pm$ 0.0123                 | 0.7023 $\pm$ 0.0175                 | 0.1698 $\pm$ 0.0156                 | 0.8909 $\pm$ 0.0056                 | 0.3554 $\pm$ 0.0437                    | 0.7519 $\pm$ 0.0224                 |
| 192                     | 0.5659 $\pm$ 0.0147                 | 0.6171 $\pm$ 0.0148                 | 0.1525 $\pm$ 0.0082                 | 0.8912 $\pm$ 0.0042                 | 0.4523 $\pm$ 0.0253                    | 0.6407 $\pm$ 0.0177                 |
| 256                     | 0.5560 $\pm$ 0.0121                 | 0.5631 $\pm$ 0.0216                 | 0.1536 $\pm$ 0.0132                 | 0.8987 $\pm$ 0.0112                 | 0.5538 $\pm$ 0.0602                    | 0.5644 $\pm$ 0.0269                 |
| 295                     | 0.5633 $\pm$ 0.0096                 | 0.5104 $\pm$ 0.0223                 | 0.1486 $\pm$ 0.0064                 | 0.8999 $\pm$ 0.0047                 | 0.6154 $\pm$ 4.486e-16                 | 0.4954 $\pm$ 0.0255                 |
| <b>ADASYN</b>           |                                     |                                     |                                     |                                     |                                        |                                     |
| 32                      | 0.6089 $\pm$ 0.0129                 | 0.8602 $\pm$ 0.0103                 | 0.3830 $\pm$ 0.0623                 | 0.8908 $\pm$ 0.0037                 | 0.1769 $\pm$ 0.0356                    | 0.9578 $\pm$ 0.0138                 |
| 64                      | 0.5977 $\pm$ 0.0166                 | 0.8154 $\pm$ 0.0207                 | 0.2481 $\pm$ 0.0530                 | 0.8899 $\pm$ 0.0033                 | 0.22 $\pm$ 0.0270                      | 0.9004 $\pm$ 0.0249                 |
| 128                     | 0.5856 $\pm$ 0.0108                 | 0.7181 $\pm$ 0.0197                 | 0.1864 $\pm$ 0.0157                 | 0.8952 $\pm$ 0.0042                 | 0.3708 $\pm$ 0.0299                    | 0.7677 $\pm$ 0.0238                 |
| 192                     | 0.5610 $\pm$ 0.0147                 | 0.6152 $\pm$ 0.0274                 | 0.1385 $\pm$ 0.0117                 | 0.8820 $\pm$ 0.0055                 | 0.3954 $\pm$ 0.0270                    | 0.6466 $\pm$ 0.0326                 |
| 256                     | 0.5525 $\pm$ 0.0107                 | 0.5787 $\pm$ 0.0163                 | 0.1483 $\pm$ 0.0081                 | 0.8921 $\pm$ 0.0063                 | 0.5 $\pm$ 0.0389                       | 0.5899 $\pm$ 0.0212                 |
| 295                     | 0.5531 $\pm$ 0.0106                 | 0.5710 $\pm$ 0.0147                 | 0.1421 $\pm$ 0.0089                 | 0.8877 $\pm$ 0.0068                 | 0.4831 $\pm$ 0.0382                    | 0.5835 $\pm$ 0.0182                 |



**Table S4.** Results for the benign *vs.* malignant primary nodule classification (Aim 2) achieved by the fitted models (in nested 5-fold CV) on the blinded test set for each minority class under-sampling method under consideration. The metrics are expressed as average  $\pm$  standard deviation.

| # Samples | AUC                 | Accuracy            | PPV                 | NPV                 | Sensitivity         | Specificity         |
|-----------|---------------------|---------------------|---------------------|---------------------|---------------------|---------------------|
| 32        | 0.5497 $\pm$ 0.0273 | 0.4521 $\pm$ 0.0930 | 0.1301 $\pm$ 0.0170 | 0.8777 $\pm$ 0.0224 | 0.5831 $\pm$ 0.0996 | 0.4334 $\pm$ 0.1163 |
| 64        | 0.5806 $\pm$ 0.0160 | 0.7662 $\pm$ 0.0196 | 0.2129 $\pm$ 0.0199 | 0.8950 $\pm$ 0.0034 | 0.3184 $\pm$ 0.0311 | 0.8301 $\pm$ 0.0250 |
| 96        | 0.5822 $\pm$ 0.0169 | 0.7798 $\pm$ 0.0222 | 0.1998 $\pm$ 0.0368 | 0.8885 $\pm$ 0.0060 | 0.2477 $\pm$ 0.0545 | 0.8558 $\pm$ 0.0290 |
| 128       | 0.5703 $\pm$ 0.0165 | 0.8573 $\pm$ 0.0195 | 0.3878 $\pm$ 0.0969 | 0.8909 $\pm$ 0.0043 | 0.1831 $\pm$ 0.0408 | 0.9536 $\pm$ 0.0245 |
| 256       | 0.6254 $\pm$ 0.0082 | 0.8742 $\pm$ 0.0026 | 0.4907 $\pm$ 0.0330 | 0.8896 $\pm$ 0.0016 | 0.1508 $\pm$ 0.0152 | 0.9776 $\pm$ 0.0031 |

**Table S5.** Radiomic features extracted from the VOIs in this study. All radiomic features were extracted using PyRadiomics and the radiomic feature formulation can be found on the online PyRadiomics documentation (<https://pyradiomics.readthedocs.io/en/latest/>)

| #                  | Radiomic feature               |
|--------------------|--------------------------------|
| <i>First-order</i> |                                |
| 1                  | 10th Percentile                |
| 2                  | 90th Percentile                |
| 3                  | Energy                         |
| 4                  | Entropy                        |
| 5                  | Interquartile Range            |
| 6                  | Kurtosis                       |
| 7                  | Maximum                        |
| 8                  | Mean Absolute Deviation        |
| 9                  | Mean                           |
| 10                 | Median                         |
| 11                 | Minimum                        |
| 12                 | Range                          |
| 13                 | Robust Mean Absolute Deviation |
| 14                 | Root Mean Squared              |
| 15                 | Skewness                       |
| 16                 | Total Energy                   |
| 17                 | Uniformity                     |

|                                               |                              |
|-----------------------------------------------|------------------------------|
| 18                                            | Variance                     |
| <i>Shape-based (3D)</i>                       |                              |
| 19                                            | Mesh Volume                  |
| 20                                            | Voxel Volume                 |
| 21                                            | Surface Area                 |
| 22                                            | Surface Area to Volume ratio |
| 23                                            | Sphericity                   |
| 24                                            | Maximum 3D diameter          |
| 25                                            | Maximum 2D diameter (slice)  |
| 26                                            | Maximum 2D diameter (column) |
| 27                                            | Maximum 2D diameter (row)    |
| 28                                            | Major Axis Length            |
| 29                                            | Minor Axis Length            |
| 30                                            | Least Axis Length            |
| 31                                            | Elongation                   |
| 32                                            | Flatness                     |
| <i>Gray Level Co-occurrence Matrix (GLCM)</i> |                              |
| 33                                            | Autocorrelation              |
| 34                                            | Cluster Prominence           |
| 35                                            | Cluster Shade                |
| 36                                            | Cluster Tendency             |
| 37                                            | Contrast                     |

|                                            |                                               |
|--------------------------------------------|-----------------------------------------------|
| 38                                         | Correlation                                   |
| 39                                         | Difference Average                            |
| 40                                         | Difference Entropy                            |
| 41                                         | Difference Variance                           |
| 42                                         | ID: Inverse Difference                        |
| 43                                         | IDM: Inverse Difference Moment                |
| 44                                         | IDMN: Inverse Difference Moment Normalized    |
| 45                                         | IDN: Inverse Difference Normalized            |
| 46                                         | IMC 1: Informational Measure of Correlation 1 |
| 47                                         | IMC 2: Informational Measure of Correlation 2 |
| 48                                         | Inverse Variance                              |
| 49                                         | Joint Average                                 |
| 50                                         | Joint Energy                                  |
| 51                                         | Joint Entropy                                 |
| 52                                         | MCC: Maximal Correlation Coefficient          |
| 53                                         | Maximum Probability                           |
| 54                                         | Sum Average                                   |
| 55                                         | Sum Entropy                                   |
| 56                                         | Sum Squares                                   |
| <i>Gray Level Dependence Matrix (GLDM)</i> |                                               |
| 57                                         | Dependence Entropy                            |
| 58                                         | Dependence NonUniformity                      |

|                                             |                                           |
|---------------------------------------------|-------------------------------------------|
| 59                                          | Dependence NonUniformity Normalised       |
| 60                                          | Dependence Variance                       |
| 61                                          | Gray Level NonUniformity                  |
| 62                                          | Gray Level Variance                       |
| 63                                          | High Gray Level Emphasis                  |
| 64                                          | Large Dependence Emphasis                 |
| 65                                          | Large Dependence High Gray Level Emphasis |
| 66                                          | Large Dependence Low Gray Level Emphasis  |
| 67                                          | Low Gray Level Emphasis                   |
| 68                                          | Small Dependence Emphasis                 |
| 69                                          | Small Dependence High Gray Level Emphasis |
| 70                                          | Small Dependence Low Gray Level Emphasis  |
| <i>Gray Level Run Length Matrix (GLRLM)</i> |                                           |
| 71                                          | Gray Level NonUniformity                  |
| 72                                          | Gray Level NonUniformity Normalised       |
| 73                                          | Gray Level Variance                       |
| 74                                          | High Gray Level Run Emphasis              |
| 75                                          | Long Run Emphasis                         |
| 76                                          | Long Run High Gray Level Emphasis         |
| 77                                          | Long Run Low Gray Level Emphasis          |
| 78                                          | Low Gray Level Run Emphasis               |
| 79                                          | Run Entropy                               |

|                                            |                                     |
|--------------------------------------------|-------------------------------------|
| 80                                         | Run Length NonUniformity            |
| 81                                         | Run Length NonUniformity Normalised |
| 82                                         | Run Percentage                      |
| 83                                         | Run Variance                        |
| 84                                         | Short Run Emphasis                  |
| 85                                         | Short Run High Gray Level Emphasis  |
| 86                                         | Short Run Low Gray Level Emphasis   |
| <i>Gray Level Size Zone Matrix (GLSZM)</i> |                                     |
| 87                                         | Gray Level NonUniformity            |
| 88                                         | Gray Level NonUniformity Normalised |
| 89                                         | Gray Level Variance                 |
| 90                                         | High Gray Level Zone Emphasis       |
| 91                                         | Large Area Emphasis                 |
| 92                                         | Large Area High Gray Level Emphasis |
| 93                                         | Large Area Low Gray Level Emphasis  |
| 94                                         | Low Gray Level Zone Emphasis        |
| 95                                         | Size Zone NonUniformity             |
| 96                                         | Size Zone NonUniformity Normalised  |
| 97                                         | Small Area Emphasis                 |
| 98                                         | Small Area High Gray Level Emphasis |
| 99                                         | Small Area Low Gray Level Emphasis  |
| 100                                        | Zone Entropy                        |

|                                                        |                 |
|--------------------------------------------------------|-----------------|
| 101                                                    | Zone Percentage |
| 102                                                    | Zone Variance   |
| <i>Neighboring Gray-Tone Difference Matrix (NGTDM)</i> |                 |
| 103                                                    | Busyness        |
| 104                                                    | Coarseness      |
| 105                                                    | Complexity      |
| 106                                                    | Contrast        |
| 107                                                    | Strength        |

**Table S6.** Characteristics of the proposed radiomics study according to the reporting guidelines provided by the Image Biomarker Standardization Initiative (IBSI) [Chapter 4].

| Topic                | Item | Description                                                                                                                    |
|----------------------|------|--------------------------------------------------------------------------------------------------------------------------------|
| <i>Patient</i>       |      |                                                                                                                                |
| Region of interest   | 1    | Lungs, pulmonary nodules                                                                                                       |
| Patient preparation  | 2a   | Subjects were only instructed to take a deep breath in during images acquisition, according to the CT scanner instructions     |
|                      | 2b   | None                                                                                                                           |
|                      | 2c   | None                                                                                                                           |
| Contrast agent       | 4a   | None                                                                                                                           |
| <i>Acquisition</i>   |      |                                                                                                                                |
| Acquisition protocol | 6    | A low dose CT protocol was used for all subjects included. Detailed information is reported in Section 2.1.1 of the main text. |
| Scanner type         | 7    | Second-generation dual-source CT scanner (Somatom Definition Flash; Siemens Medical Solutions; Forchheim, Germany).            |
| Imaging modality     | 8    | Computed Tomography                                                                                                            |
| Static/dynamic scans | 9a   | Static                                                                                                                         |

|                                                              |     |                                                                                                                                                                                                                                                                                                                                                                           |
|--------------------------------------------------------------|-----|---------------------------------------------------------------------------------------------------------------------------------------------------------------------------------------------------------------------------------------------------------------------------------------------------------------------------------------------------------------------------|
| Scanner calibration                                          | 10  | Routine scanner calibration was performed at the beginning of each session                                                                                                                                                                                                                                                                                                |
| Patient instructions                                         | 11  | Subjects lying in the supine position were instructed to hold a deep breath in during images acquisition                                                                                                                                                                                                                                                                  |
| Anatomical motion correction                                 | 12  | None                                                                                                                                                                                                                                                                                                                                                                      |
| Scan rotation time                                           | 13  | 0.5 sec                                                                                                                                                                                                                                                                                                                                                                   |
| Tube voltage                                                 | 14  | 120 kVp                                                                                                                                                                                                                                                                                                                                                                   |
| Tube current                                                 | 15  | 30 mAs                                                                                                                                                                                                                                                                                                                                                                    |
| <b><i>Reconstruction</i></b>                                 |     |                                                                                                                                                                                                                                                                                                                                                                           |
| In-plane resolution                                          | 28  | Matrix size of 512x512                                                                                                                                                                                                                                                                                                                                                    |
| Image slice thickness                                        | 29  | 1 mm                                                                                                                                                                                                                                                                                                                                                                      |
| Image slice spacing                                          | 30  | 0.7 mm                                                                                                                                                                                                                                                                                                                                                                    |
| Convolution kernel                                           | 31a | Medium-sharp kernel (B50f)                                                                                                                                                                                                                                                                                                                                                |
| <b><i>Image registration</i></b>                             |     |                                                                                                                                                                                                                                                                                                                                                                           |
| Registration method                                          | 37  | Not applicable since only CT images were analyzed                                                                                                                                                                                                                                                                                                                         |
| <b><i>Image processing - data conversion</i></b>             |     |                                                                                                                                                                                                                                                                                                                                                                           |
| Other data conversions                                       | 40  | None                                                                                                                                                                                                                                                                                                                                                                      |
| <b><i>Image processing – post-acquisition processing</i></b> |     |                                                                                                                                                                                                                                                                                                                                                                           |
| Anti-aliasing                                                | 41  | None                                                                                                                                                                                                                                                                                                                                                                      |
| Noise suppression                                            | 42  | None                                                                                                                                                                                                                                                                                                                                                                      |
| Other post-acquisition processing methods                    | 47  | None                                                                                                                                                                                                                                                                                                                                                                      |
| <b><i>Segmentation</i></b>                                   |     |                                                                                                                                                                                                                                                                                                                                                                           |
| Segmentation method                                          | 48a | Semi-automated with manual refinements                                                                                                                                                                                                                                                                                                                                    |
|                                                              | 48b | Segmentations were performed by a radiologist with one year of expertise in thoracic imaging                                                                                                                                                                                                                                                                              |
|                                                              | 48c | Pulmonary nodules were semi-automatically delineated every two slices through manually drawn regions of interest (ROIs) and the remaining slices were interpolated accordingly. A dedicated algorithm tool was then used to calculate a volume of interest (VOI), including the whole lesions. In case of inaccurate segmentation, the operator was allowed to modify VOI |



|                                                |     |                                                                                                                                                                                                                                                                                                                                                                                                                                                                                     |
|------------------------------------------------|-----|-------------------------------------------------------------------------------------------------------------------------------------------------------------------------------------------------------------------------------------------------------------------------------------------------------------------------------------------------------------------------------------------------------------------------------------------------------------------------------------|
|                                                |     | boundaries.                                                                                                                                                                                                                                                                                                                                                                                                                                                                         |
| <i>Image processing – image interpolation</i>  |     |                                                                                                                                                                                                                                                                                                                                                                                                                                                                                     |
| Interpolation method                           | 50a | None                                                                                                                                                                                                                                                                                                                                                                                                                                                                                |
|                                                | 50b | None                                                                                                                                                                                                                                                                                                                                                                                                                                                                                |
|                                                | 50c | None                                                                                                                                                                                                                                                                                                                                                                                                                                                                                |
|                                                | 50d | None                                                                                                                                                                                                                                                                                                                                                                                                                                                                                |
| Voxel dimensions                               | 51  | None                                                                                                                                                                                                                                                                                                                                                                                                                                                                                |
| Intensity rounding                             | 52  | None                                                                                                                                                                                                                                                                                                                                                                                                                                                                                |
| <i>Image processing – ROI interpolation</i>    |     |                                                                                                                                                                                                                                                                                                                                                                                                                                                                                     |
| Interpolation method                           | 53  | Linear                                                                                                                                                                                                                                                                                                                                                                                                                                                                              |
| Partially masked voxels                        | 54  | Inaccurate interpolation results were modified manually by the operator                                                                                                                                                                                                                                                                                                                                                                                                             |
| <i>Image processing – re-segmentation</i>      |     |                                                                                                                                                                                                                                                                                                                                                                                                                                                                                     |
| Re-segmentation methods                        | 55  | Not applied                                                                                                                                                                                                                                                                                                                                                                                                                                                                         |
| <i>Image processing - discretisation</i>       |     |                                                                                                                                                                                                                                                                                                                                                                                                                                                                                     |
| Discretization method                          | 56a | Fixed bin width                                                                                                                                                                                                                                                                                                                                                                                                                                                                     |
|                                                | 56b | Bin width = 25 (default in PyRadiomics)                                                                                                                                                                                                                                                                                                                                                                                                                                             |
|                                                | 56c | No re-segmentation range was used                                                                                                                                                                                                                                                                                                                                                                                                                                                   |
| <i>Image processing – image transformation</i> |     |                                                                                                                                                                                                                                                                                                                                                                                                                                                                                     |
| Image filter                                   | 57  | Not currently used                                                                                                                                                                                                                                                                                                                                                                                                                                                                  |
| <i>Image biomarker computation</i>             |     |                                                                                                                                                                                                                                                                                                                                                                                                                                                                                     |
| Biomarker set                                  | 58  | 107 radiomic features, extracted using a segmentation software built-in function, named SlicerRadiomics, which integrates the tool PyRadiomics.<br>Six classes of features were obtained: (1) first-order intensity histogram statistics, (2) Gray Level Co-occurrence Matrix features (GLCM), (3) Gray Level Run Length Matrix (GLRLM), (4) Gray Level Size Zone Matrix (GLSZM), (5) Gray Level Dependence Matrix (GLDM), and (6) Neighboring Gray Tone Difference Matrix (NGTDM). |
| IBSI compliance                                | 59  | The software used that is aimed at measuring standardized radiomic features is fully compliant with the IBSI standard.                                                                                                                                                                                                                                                                                                                                                              |

|                                                         |           |                                                                                                                                                         |
|---------------------------------------------------------|-----------|---------------------------------------------------------------------------------------------------------------------------------------------------------|
| Robustness                                              | 60        | Not currently present                                                                                                                                   |
| Software availability                                   | 61        | SlicerRadiomics + PyRadiomics v2.2.0 ( <i>via</i> 3D Slicer 4.10.0)                                                                                     |
| <i>Image biomarker computation – texture parameters</i> |           |                                                                                                                                                         |
|                                                         | 62–<br>71 | Default settings of PyRadiomics (for full reproducibility)                                                                                              |
| <i>Machine learning and radiomics analysis</i>          |           |                                                                                                                                                         |
| Diagnostic and prognostic modelling                     | 72        | The TRIPOD Checklist for Prediction Model Development and Validation was used                                                                           |
| Comparison with known factors                           | 73        | The radiomics model was compared to the characterization and screening LDCT recall intervals of subjects with indeterminate prevalent pulmonary nodules |
| Multicollinearity                                       | 74        | Non-redundant feature analysis based on the Spearman correlation coefficient                                                                            |
| Model availability                                      | 75        | Available upon reasonable request                                                                                                                       |
| Data availability                                       | 76        | Data are not publicly available due to restrictions for ethical reasons.                                                                                |
